# Supplementary material for: Two structurally new Lindqvist hexaniobate-templated silver thiolate clusters
Source: Royal Society of Chemistry journal article supplement (doi:10.1039/d4cc00681j), 2024-01-01
Supplement: d4cc00681j1.pdf [file d4cc00681j1.pdf]

## Electronic Supplementary Information

# Two structurally new Lindqvist hexaniobate-templated silver thiolate clusters

Zichen Zhao,<sup>a</sup> Mengyun Zhao,<sup>a</sup> Lan Deng,<sup>\*a</sup> Qing Li,<sup>a</sup> Jing Zhang,<sup>a</sup> Haifeng Su,<sup>b</sup> Hongjin Lv,<sup>\*a</sup> Guo-Yu Yang<sup>a</sup>

<sup>a</sup> MOE Key Laboratory of Cluster Science, Beijing Key Laboratory of Photoelectric/Electrophotonic Conversion Materials, School of Chemistry and Chemical Engineering, Beijing Institute of Technology, Beijing 102488, P. R. China.

<sup>b</sup> College of Chemistry and Chemical Engineering, Xiamen University, Xiamen 361005, People's Republic of China

Corresponding author E-mail: [hlv@bit.edu.cn](mailto:hlv@bit.edu.cn); [landeng@bit.edu.cn](mailto:landeng@bit.edu.cn)

### Table of contents

|                                                                                                                               |    |
|-------------------------------------------------------------------------------------------------------------------------------|----|
| 1. <b>Experimental details</b> .....                                                                                          | S3 |
| 2. <b>Single-crystal X-ray crystallography</b> .....                                                                          | S4 |
| 3. <b>Bond valence sum (BVS) calculation</b> .....                                                                            | S5 |
| 4. <b>Fig. S1</b> The digital photographs of <b>Ag<sub>45</sub></b> and <b>Ag<sub>41</sub></b> crystals.....                  | S5 |
| 5. <b>Fig. S2</b> ORTEP representation of the <b>Ag<sub>45</sub></b> cluster.....                                             | S6 |
| 6. <b>Fig. S3</b> ORTEP representation of the <b>Ag<sub>41</sub></b> cluster.....                                             | S6 |
| 7. <b>Fig. S4</b> Experimental and simulated PXRD patterns of <b>Ag<sub>45</sub></b> and <b>Ag<sub>41</sub></b> clusters..... | S7 |
| 8. <b>Fig. S5</b> The coordination modes of [Nb <sub>6</sub> O <sub>19</sub> ] <sup>8-</sup> anion towards silver atoms.....  | S7 |
| 9. <b>Fig. S6</b> FT-IR spectra of TBA-Nb <sub>6</sub> , <b>Ag<sub>45</sub></b> , and <b>Ag<sub>41</sub></b> clusters.....    | S8 |

|                                                                                                                                                       |     |
|-------------------------------------------------------------------------------------------------------------------------------------------------------|-----|
| 10. <b>Fig. S7</b> XPS data of <b>Ag<sub>45</sub></b> cluster.....                                                                                    | S8  |
| 11. <b>Fig. S8</b> XPS data of <b>Ag<sub>41</sub></b> cluster.....                                                                                    | S9  |
| 12. <b>Fig. S9</b> Positive-ion ESI-MS spectra of the clusters of <b>Ag<sub>45</sub></b> dissolved in CH <sub>3</sub> OH.....                         | S9  |
| 13. <b>Fig. S10</b> Positive-ion ESI-MS spectra of the clusters of <b>Ag<sub>41</sub></b> dissolved in CH <sub>3</sub> OH.....                        | S10 |
| 14. <b>Fig. S11</b> The coordination modes of 23 <sup>-</sup> PrS ligands towards silver atoms in <b>Ag<sub>45</sub></b> cluster.....                 | S10 |
| 15. <b>Fig. S12</b> The coordination modes of 14 CH <sub>3</sub> COO <sup>-</sup> ligands towards silver atoms in <b>Ag<sub>45</sub></b> cluster..... | S11 |
| 16. <b>Fig. S13</b> The coordination modes of 24 <sup>-</sup> PrS ligands towards silver atoms in <b>Ag<sub>41</sub></b> cluster.....                 | S11 |
| 17. <b>Fig. S14</b> The coordination modes of 5 CH <sub>3</sub> COO <sup>-</sup> ligands towards silver atoms in <b>Ag<sub>41</sub></b> cluster.....  | S12 |
| 18. <b>Fig. S15</b> The coordination modes of S atoms in <b>Ag<sub>41</sub></b> cluster.....                                                          | S12 |
| 19. <b>Fig. S16</b> Packing structure of <b>Ag<sub>45</sub></b> cluster in the <i>bc</i> plane.....                                                   | S13 |
| 20. <b>Fig. S17</b> Packing structure of <b>Ag<sub>41</sub></b> cluster.....                                                                          | S13 |
| 21. <b>Fig. S18</b> One-dimensional chain structure of <b>Ag<sub>41</sub></b> cluster.....                                                            | S14 |
| 22. <b>Fig. S19</b> The solid-state UV-vis spectra of <b>Ag<sub>45</sub></b> and <b>Ag<sub>41</sub></b> clusters.....                                 | S14 |
| 23. <b>Fig. S20</b> Photothermal conversion of <b>Ag<sub>45</sub></b> and <b>Ag<sub>41</sub></b> clusters under 532 nm laser irradiation.....         | S15 |
| 24. <b>Fig. S21</b> FT-IR spectra of (a) <b>Ag<sub>45</sub></b> and (b) <b>Ag<sub>41</sub></b> clusters before and after photothermal tests.....      | S15 |
| 25. <b>Fig. S22</b> TGA curves of <b>Ag<sub>45</sub></b> at a scanning rate of 10 °C/ min under N <sub>2</sub> atmosphere.....                        | S16 |
| 26. <b>Fig. S23</b> FT-IR spectra of <b>Ag<sub>41</sub></b> clusters before and after heating 80 °C.....                                              | S16 |
| 27. <b>Table S1</b> Crystal data and structure refinements for <b>Ag<sub>45</sub></b> and <b>Ag<sub>41</sub></b> .....                                | S17 |
| 28. <b>Table S2</b> Selected bond distances (Å) for <b>Ag<sub>45</sub></b> .....                                                                      | S18 |
| 29. <b>Table S3</b> Selected bond distances (Å) for <b>Ag<sub>41</sub></b> .....                                                                      | S20 |
| 30. <b>Table S4</b> BVS values for Nb atoms of <b>Ag<sub>45</sub></b> .....                                                                           | S22 |
| 31. <b>Table S5</b> BVS values for Nb atoms of <b>Ag<sub>41</sub></b> .....                                                                           | S22 |
| 32. <b>Table S6</b> PL decay lifetimes of <b>Ag<sub>45</sub></b> and <b>Ag<sub>41</sub></b> clusters upon excitation at 390 nm.....                   | S22 |
| 33. <b>References</b> .....                                                                                                                           | S23 |

## Experimental details

**Chemicals and Materials.** The  $(i\text{PrSAg})_n$  precursor and the  $[(\text{CH}_3)_4\text{N}]_5[\text{H}_3\text{Nb}_6\text{O}_{19}] \cdot 20\text{H}_2\text{O}$  (TMA-Nb<sub>6</sub>) PONbs were synthesized according to the relevant literatures.<sup>1,2</sup> The chemicals and solvents used in the syntheses were purchased from commercial sources and used as received without further purification. Niobium(V) oxide (Nb<sub>2</sub>O<sub>5</sub>) and silver acetate were purchased from Shanghai Macklin Biochemical Co., Ltd and used as received. *i*PrSH (Adamas-beta®) was purchased from Shanghai Titan Scientific Co.,Ltd and used as received. Silver acetate was purchased from Shanghai Macklin Biochemical Co., Ltd and used as received.

**Characterization.** The FT-IR spectra were performed on a Bruker Tensor II spectrometer using ~2 wt% KBr pellets in the range of 4000-400 cm<sup>-1</sup>. UV-vis spectra were acquired on a Techcomp UV 2600 spectrophotometer at room temperature in the 200-800 nm range with optional Integration Sphere accessory. ICP-AES analyses for Ag and Nb were conducted with Spectro Arcos EOP (Axial View Inductively Coupled Plasma Spectrometer). Elemental analyses were performed on an Elementar UNICUBE. The X-ray Photoelectron Spectrum (XPS) was measured on a PHI5000 Versaprobe III. The steady-state luminescence quenching spectra was measured using Edinburgh Instruments FS5 Spectrofluorometer. The High-Resolution Electrospray Mass Spectrometry was performed on an Agilent (Santa Clara, CA, USA) ESI-TOF mass spectrometer (6224) from saturated solution of Ag<sub>45</sub> and Ag<sub>41</sub> in CH<sub>3</sub>OH. Emission lifetime was measured with an EPL-365 picosecond pulsed diode laser system. Thermogravimetric analysis (TGA) was performed with a EXSTAR 7200 thermal analyzer at a scanning rate of 10 °C/min under N<sub>2</sub> atmosphere, from 30 to 800 °C. Powder XRD patterns were measured on a MiniFlex 600 diffractometer with a Cu-Kα X-ray radiation source. Photothermal measurements were conducted using Laser MGL-III-532nm-300mW. The photothermal behavior of the sample was monitored by thermal imaging camera (Fotric 326C). Infrared photos and real-time temperatures were extracted from the video by FLIR tools software.

**Synthesis of  $[\text{Nb}_6\text{O}_{19}@\text{Ag}_{45}(i\text{PrS})_{23}(\text{CH}_3\text{COO})_{14}]$  (Ag<sub>45</sub>).**  $(i\text{PrSAg})_n$  (0.05 mmol, 9.2 mg) and CH<sub>3</sub>COOAg (0.1 mmol, 16.7 mg) together with TMA-Nb<sub>6</sub> (0.005 mmol, 8.2 mg) were dissolved in a mixed solvent of methanol: N,N'- dimethylformamide (5 mL, v/v = 1/1) under stirring at room temperature for 3 h. The reaction mixture was sealed and heated at 65 °C for 33 h, and then cooled to room temperature for 12 h. After cooling to room temperature, the light-yellow solution was filtered, and the filtrate was left for evaporation at room temperature in dark. The yellow block crystals of Ag<sub>45</sub> were crystallized after two months in ~11.5% yield (based on Ag). Elemental analysis: Calcd (%) for C<sub>97</sub>H<sub>203</sub>O<sub>47</sub>S<sub>23</sub>Nb<sub>6</sub>Ag<sub>45</sub> (FW = 8270.57): Ag, 58.69; Nb, 6.74; C, 14.09; H, 2.47. Found: Ag, 57.89; Nb, 6.98; C, 14.69; H, 2.78.

**Synthesis of  $(\text{H}_3\text{O})_4[\text{Nb}_6\text{O}_{19}@\text{Ag}_{41}\text{KS}_{2.5}\text{O}_2(\text{H}_2\text{O})_{7.5}(i\text{PrS})_{24}(\text{CH}_3\text{COO})_5]$  (Ag<sub>41</sub>).** The synthetic conditions were same as the procedure described for Ag<sub>45</sub>, except that the reaction temperature was raised to 70 °C. After cooling to room temperature, the light-yellow solution was filtered and the filtrate left to evaporate slowly for one month in the dark at room temperature. The light red crystals of Ag<sub>41</sub> were isolated in ~9.6% yield (based on Ag). Elemental analysis: Calcd (%) for C<sub>82</sub>H<sub>210</sub>Ag<sub>41</sub>KNb<sub>6</sub>O<sub>42.5</sub>S<sub>26.5</sub> (FW = 7745.31): Ag, 57.10; Nb, 7.19; C, 12.71; H, 2.71. Found: Ag, 58.21; Nb, 7.23; C, 12.94; H, 2.98.

**Discussion on polyoxoniobate-templated silver clusters.** Currently, there are very limited reports on polyoxoniobate-templated silver clusters, which to our knowledge could be attributed to the following aspects: (1) there are limited structures of polyoxoniobates (PONbs) in comparison with those of polyoxovanadates (POVs), polyoxotungstates (POTs), and polyoxomolybdates (POMos) as mentioned by the reviewer; (2) it is extremely challenging for PONbs to produce secondary building blocks compared to that of diverse lacunary structures of POTs/POMos (e.g. lacunary Keggin- / Dawson-type structures); (3) the solubility of PONbs in organic solvents is extremely low, making it incompatible with the solubility of regular Ag chemicals used for syntheses; (4) PONbs prefer alkaline environment to remain good stability, while such alkaline environment is not friendly to common Ag(I) complexes. Therefore, the synthesis of PONb-templated silver clusters is a very difficult and challenging task.

Regarding the difference of our work from the reported PONb-templated silver clusters, there is only one relevant report by Zheng and co-workers (*Chem. Commun.*, 2023, **59**, 2927-2930.). In this work, the authors have synthesized the Nb<sub>6</sub>-templated Ag cluster (**Ag<sub>34</sub>**) using tert-butyl acetylene as a peripheral protective ligand through the solvothermal reaction of six chemicals in a ternary CH<sub>3</sub>CN-DMF-H<sub>2</sub>O solvent system. There are six discrete **Ag<sub>34</sub>** clusters packed together by noncovalent interactions such as van der Waals forces within one unit cell. The authors performed the ESI-MS measurement on the target **Ag<sub>34</sub>** cluster and studied its temperature-dependent emission behavior.

In contrast, we synthesized two structurally new Lindqvist hexaniobate-templated silver thiolate clusters **Ag<sub>45</sub>** and **Ag<sub>41</sub>** by using <sup>i</sup>PrS<sup>-</sup> and CH<sub>3</sub>COO<sup>-</sup> as surface-protecting ligands, which can further form a two-dimensional (2D) **Ag<sub>45</sub>** assembly and one-dimensional (1D) **Ag<sub>41</sub>** chain packing structures. Interestingly, the **Ag<sub>45</sub>** cluster can form a 2D packing structure, while the **Ag<sub>41</sub>** cluster can form a 1D chain through coordination bonds. Moreover, both **Ag<sub>45</sub>** and **Ag<sub>41</sub>** clusters exhibited intriguing photothermal conversion property and temperature-dependent emission behavior.

## Single-crystal X-ray crystallography

The high-quality crystal of **Ag<sub>45</sub>** and **Ag<sub>41</sub>** with appropriate dimensions was chosen under an optical microscope and quickly immersed in crystal oil to prevent decomposition at both ends for data collection at 179.99 K. Crystallographic data of **Ag<sub>45</sub>** was collected on a XtaLAB Synergy R, DW system, HyPix diffractometer with Mo K $\alpha$  radiation (graphite monochromator,  $\lambda = 0.71073$  Å). The structure of **Ag<sub>45</sub>** was solved with the Olex2 structure solution program using Charge Flipping,<sup>3,4</sup> and refined with the XL refinement package using Least Squares minimisation.<sup>5</sup> Crystallographic data of **Ag<sub>41</sub>** was collected on a Bruker APEX-II CCD diffractometer with Mo K $\alpha$  radiation (graphite monochromator,  $\lambda = 0.71073$  Å). The structure of **Ag<sub>41</sub>** was solved with the Olex2 and the SHELXT structure solution program using Charge Flipping,<sup>3,6</sup> and refined with the SHLXL refinement package using Least Squares minimisation.<sup>6</sup> All non-hydrogen atoms were refined anisotropically, while hydrogen atoms on carbon atoms were generated geometrically and refined isotropically. A solvent mask has been used in the refinement of **Ag<sub>41</sub>** crystal, it is calculated as 59 masked electrons in a volume of 256 Å<sup>3</sup> per Asymmetric Unit in **Ag<sub>41</sub>**, which is consistent with the presence of 1 [H<sub>3</sub>O]<sup>+</sup>, 1 [H<sub>9</sub>O<sub>4</sub>] (1 H<sub>3</sub>O<sup>+</sup>; 3 H<sub>2</sub>O) and 0.75 [H<sub>2</sub>O] moieties that account for 60 electrons per Asymmetric Unit. To refine a sensible molecular model, the whole arsenal of SHELXL restraints had to be used (ISOR, DFIX, EADP, and SIMU). Some Ag atoms were refined as disordered, appropriate restraints and constraints were applied to the geometry and atomic displacement parameters of atoms in **Ag<sub>45</sub>** and **Ag<sub>41</sub>** clusters. In addition, there were two Ag/K disordered metal sites with Ag and K atoms adopting

50% occupancy in **Ag<sub>41</sub>** cluster. Crystal structure graphics and their packing diagrams were drawn by using Diamond 4 software. Detailed crystallographic data for complexes **Ag<sub>45</sub>** and **Ag<sub>41</sub>** are supplemented in Table S1. CCDC 2331897 and 2347574 contain the supplementary crystallographic data for **Ag<sub>45</sub>** and **Ag<sub>41</sub>**, respectively. The crystallographic data can be obtained from The Cambridge Crystallographic Data Centre via [www.ccdc.cam.ac.uk/data\\_request/cif](http://www.ccdc.cam.ac.uk/data_request/cif).

## Bond valence sum (BVS) calculation

The BVS values were calculated by the expression for the variation of the length  $r_{ab}$  of a bond between two atoms a and b in observed crystal with valence  $V_a$ .<sup>7</sup>

$$V_a = \sum \exp\left(\frac{r_0 - r_{ab}}{B}\right)$$

where B is constant equal to 0.37 Å,  $r_0$  is bond valence parameter for a given atom pair.

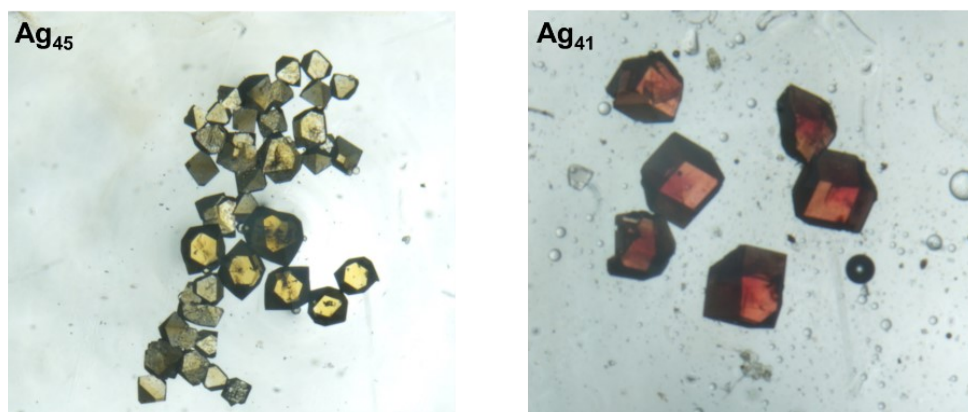

**Fig. S1** The digital photographs of **Ag<sub>45</sub>** and **Ag<sub>41</sub>** crystals taken under the microscope.

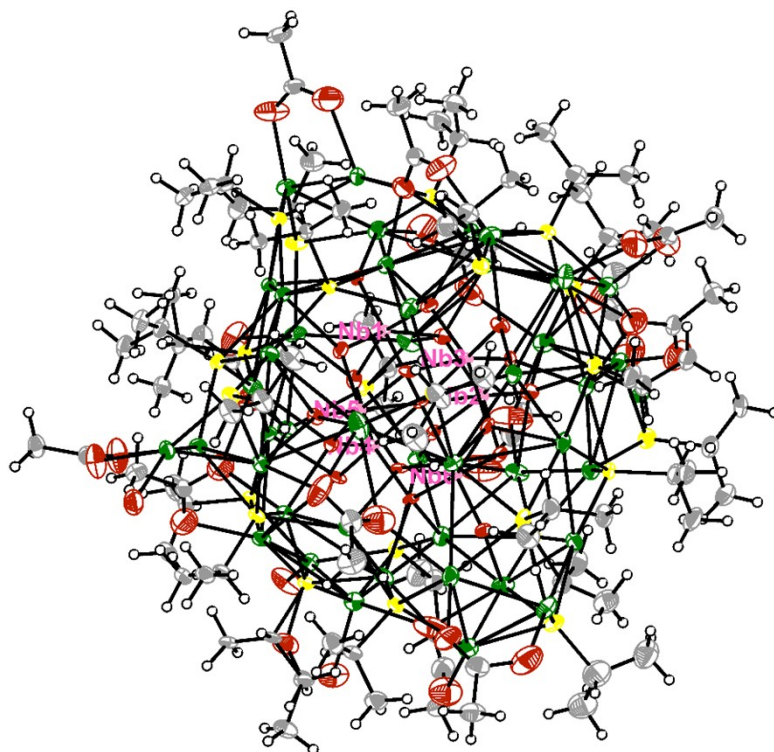

**Fig. S2** A displacement ellipsoid plot of the Ag<sub>45</sub> cluster. Non-H atoms are represented by ellipsoids at the 30% probability. (Color legend: green, Ag; pink, Nb; yellow, S; red, O; gray, C; white, H.)

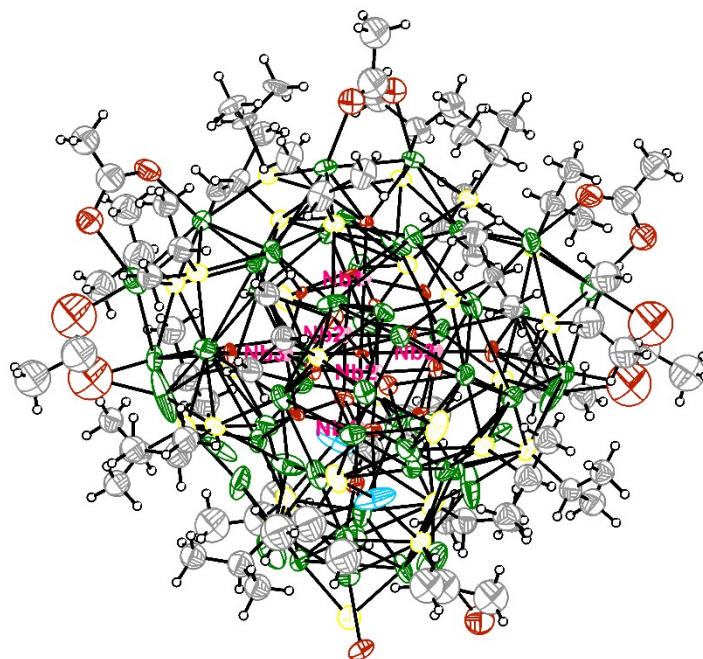

**Fig. S3** A displacement ellipsoid plot of the Ag<sub>41</sub> cluster. Non-H atoms are represented by ellipsoids at the 30% probability. Color codes: green, Ag; pink, Nb; yellow, S; red, O; gray, C; sky blue, Ag/K; white, H. Note: in these two disordered Ag/K atoms, both Ag<sub>29</sub> and K<sub>1</sub> atoms were refined as 50% occupancy.

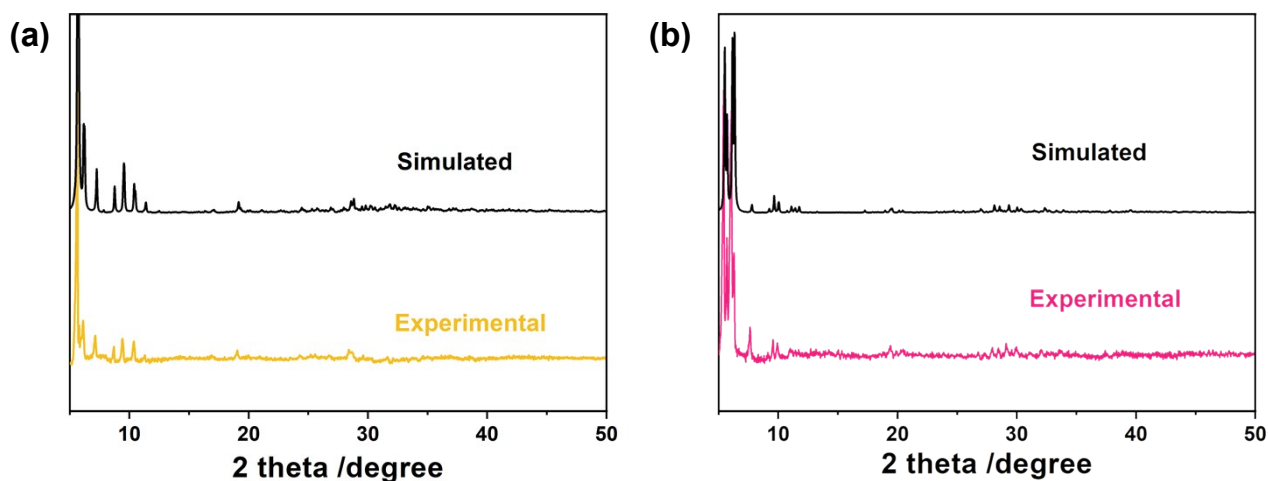

Fig. S4 Experimental and simulated PXRD patterns of (a)  $\text{Ag}_{45}$  and (b)  $\text{Ag}_{41}$  clusters.

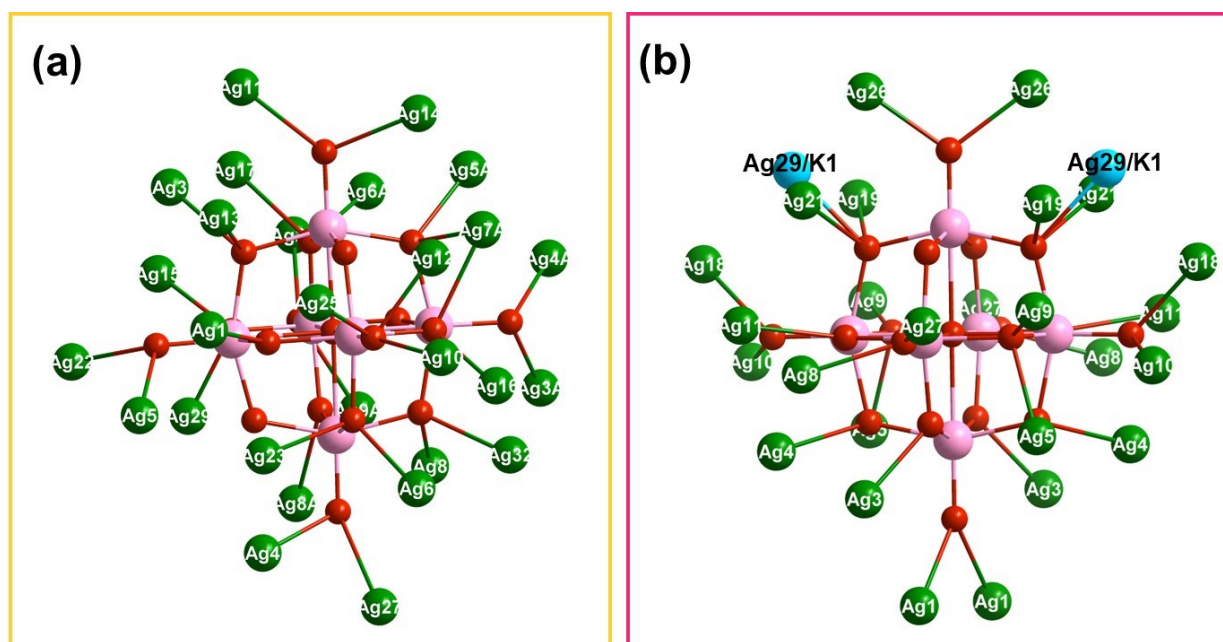

Fig. S5 The coordination modes of  $[\text{Nb}_6\text{O}_{19}]^{8-}$  anion towards 28 silver atoms in  $\text{Ag}_{45}$  (a) and a total of 27 silver atoms in  $\text{Ag}_{41}$  (b). Color codes: pink, Nb; green, Ag; red, O; sky blue, Ag/K. Note: in these two disordered Ag/K atoms, both Ag29 and K1 atoms were refined as 50% occupancy.

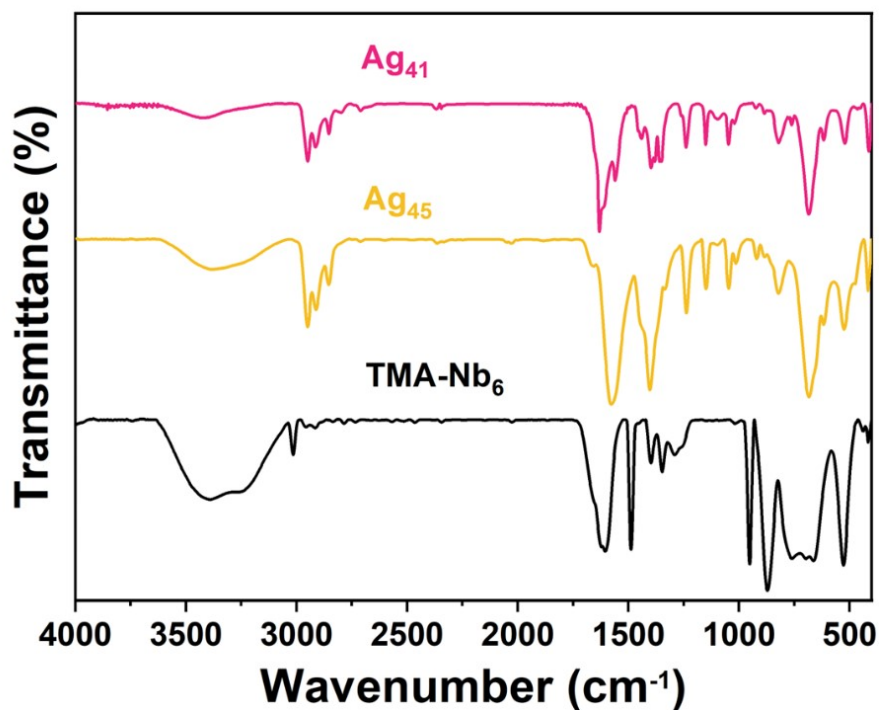

Fig. S6 FT-IR spectra of TBA-Nb<sub>6</sub>, Ag<sub>45</sub>, and Ag<sub>41</sub> clusters, respectively.

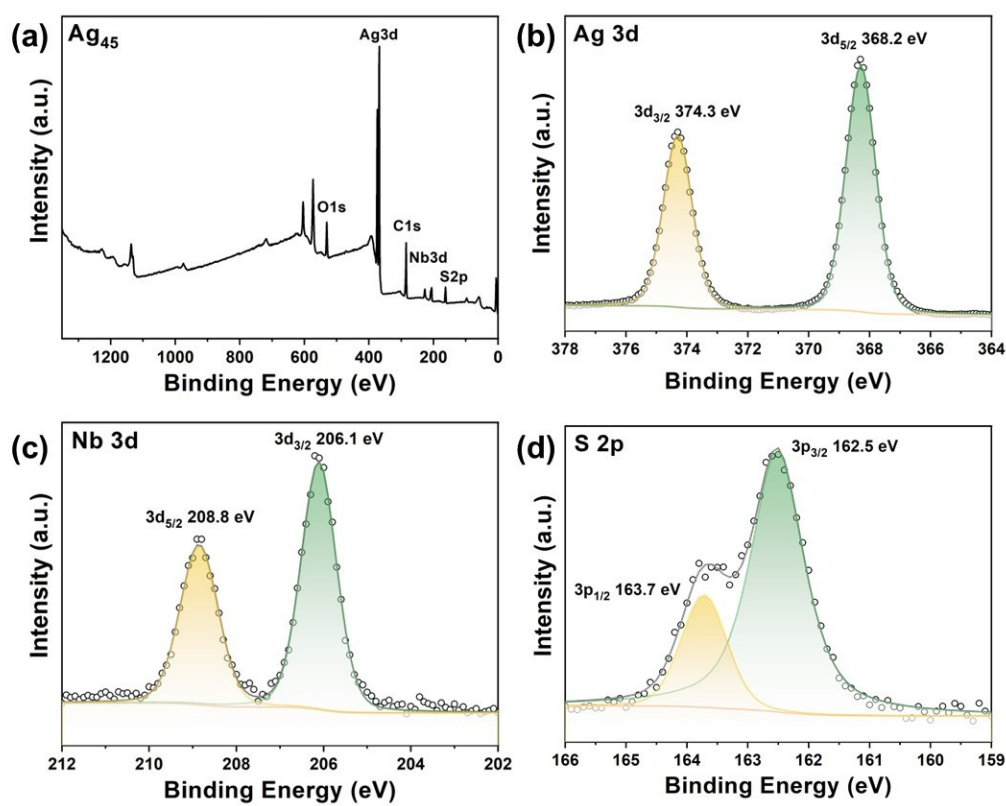

Fig. S7 (a) XPS survey spectrum of Ag<sub>45</sub> cluster; high resolution XPS spectra of (b) Ag 3d, (c) Nb 3d, and (d) S 2p in Ag<sub>45</sub> cluster.



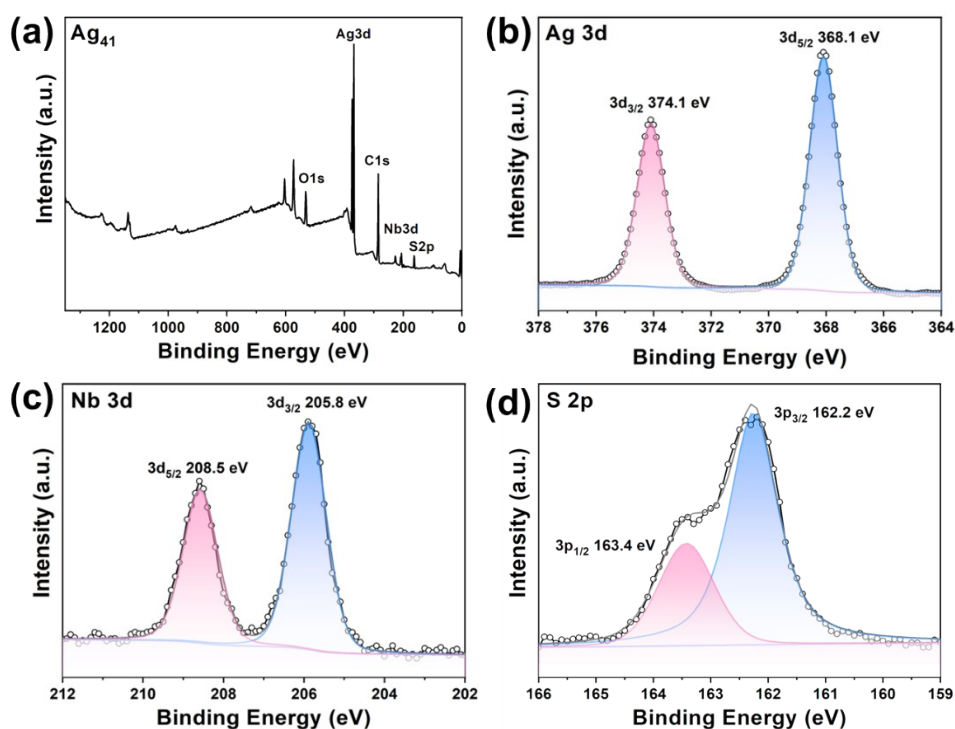

**Fig. S8** (a) XPS survey spectrum of  $\text{Ag}_{41}$  cluster; high resolution XPS spectra of (b) Ag 3d, (c) Nb 3d, and (d) S 2p in  $\text{Ag}_{41}$  cluster.

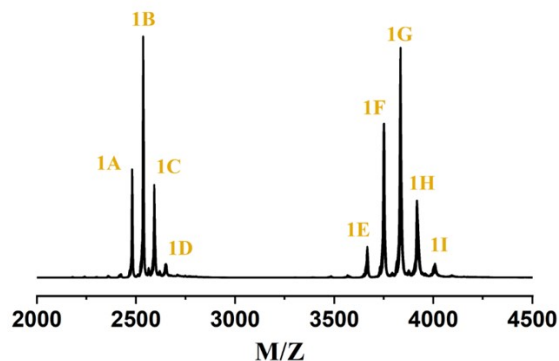

| Peak | Species                                                                                         | Exp. m/z | Sim. m/z |
|------|-------------------------------------------------------------------------------------------------|----------|----------|
| 1A   | $[\text{M} - 6\text{CH}_3\text{COO} - {}^i\text{PrS} + \text{CH}_3\text{OH} - 4\text{Ag}]^{3+}$ | 2480.37  | 2480.58  |
| 1B   | $[\text{M} - 5\text{CH}_3\text{COO} - {}^i\text{PrS} + \text{CH}_3\text{OH} - 3\text{Ag}]^{3+}$ | 2536.38  | 2536.22  |
| 1C   | $[\text{M} - 4\text{CH}_3\text{COO} - {}^i\text{PrS} + \text{CH}_3\text{OH} - 2\text{Ag}]^{3+}$ | 2592.33  | 2591.85  |
| 1D   | $[\text{M} - 3\text{CH}_3\text{COO} - {}^i\text{PrS} + \text{CH}_3\text{OH} - \text{Ag}]^{3+}$  | 2648.03  | 2647.49  |
| 1E   | $[\text{M} - 6\text{CH}_3\text{COO} - {}^i\text{PrS} + \text{CH}_3\text{OH} - 5\text{Ag}]^{2+}$ | 3666.60  | 3666.94  |
| 1F   | $[\text{M} - 5\text{CH}_3\text{COO} - {}^i\text{PrS} + \text{CH}_3\text{OH} - 4\text{Ag}]^{2+}$ | 3750.01  | 3750.39  |
| 1G   | $[\text{M} - 4\text{CH}_3\text{COO} - {}^i\text{PrS} + \text{CH}_3\text{OH} - 3\text{Ag}]^{2+}$ | 3834.21  | 3833.85  |
| 1H   | $[\text{M} - 3\text{CH}_3\text{COO} - {}^i\text{PrS} + \text{CH}_3\text{OH} - 2\text{Ag}]^{2+}$ | 3916.90  | 3917.30  |
| 1I   | $[\text{M} - 3\text{CH}_3\text{COO} + \text{CH}_3\text{OH} - \text{Ag}]^{2+}$                   | 4007.61  | 4008.81  |

**Fig. S9** Positive-ion ESI-MS spectrum and assigned formulae of  $\text{Ag}_{45}$  cluster dissolved in  $\text{CH}_3\text{OH}$ . Note:  $\text{M} = [\text{Nb}_6\text{O}_{19}@_{\text{Ag}_{45}}({}^i\text{PrS})_{23}(\text{CH}_3\text{COO})_{14}]$ .

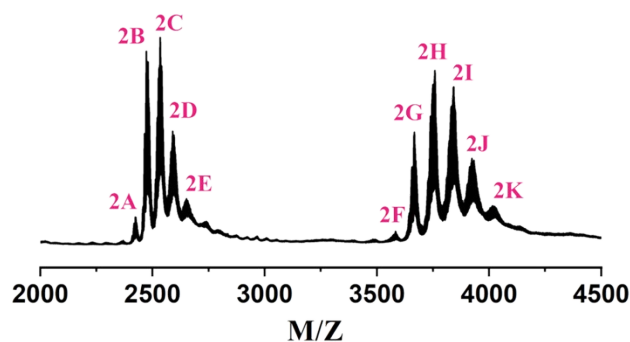

| Peak | Species                                                                                | Exp. m/z | Sim. m/z |
|------|----------------------------------------------------------------------------------------|----------|----------|
| 2A   | $[M - 4\text{CH}_3\text{COO} - 2^i\text{PrS} + \text{H}_2\text{O} - \text{Ag}]^{3+}$   | 2422.99  | 2422.71  |
| 2B   | $[M - 3\text{CH}_3\text{COO} - 2^i\text{PrS} + \text{H}_2\text{O}]^{3+}$               | 2478.63  | 2478.34  |
| 2C   | $[M - 3\text{CH}_3\text{COO} - ^i\text{PrS} + \text{Ag}]^{3+}$                         | 2533.64  | 2533.35  |
| 2D   | $[M - 2\text{CH}_3\text{COO} - ^i\text{PrS} + 2\text{Ag}]^{3+}$                        | 2589.27  | 2588.99  |
| 2E   | $[M - \text{CH}_3\text{COO} - ^i\text{PrS} + \text{H}_2\text{O} + 3\text{Ag}]^{3+}$    | 2650.91  | 2650.62  |
| 2F   | $[M - 4\text{CH}_3\text{COO} - 2^i\text{PrS} + \text{H}_2\text{O} - 2\text{Ag}]^{2+}$  | 3580.56  | 3580.12  |
| 2G   | $[M - 3\text{CH}_3\text{COO} - 2^i\text{PrS} + \text{CH}_3\text{OH} - \text{Ag}]^{2+}$ | 3671.03  | 3670.60  |
| 2H   | $[M - 2\text{CH}_3\text{COO} - 2^i\text{PrS} + \text{CH}_3\text{OH}]^{2+}$             | 3754.46  | 3754.05  |
| 2I   | $[M - 2\text{CH}_3\text{COO} - ^i\text{PrS} + \text{CH}_3\text{OH} + \text{Ag}]^{2+}$  | 3846.00  | 3845.56  |
| 2J   | $[M - \text{CH}_3\text{COO} - ^i\text{PrS} + \text{CH}_3\text{OH} + 2\text{Ag}]^{2+}$  | 3929.45  | 3929.01  |
| 2K   | $[M - \text{CH}_3\text{COO} + \text{CH}_3\text{OH} + 3\text{Ag}]^{2+}$                 | 4020.96  | 4020.53  |

**Fig. S10** Positive-ion ESI-MS spectrum and assigned formulae of  $\text{Ag}_{41}$  cluster dissolved in  $\text{CH}_3\text{OH}$ . Note:  $M = (\text{H}_3\text{O})_4[\text{Nb}_6\text{O}_{19}@_{\text{Ag}_{41}}\text{KS}_{2.5}\text{O}_2(\text{H}_2\text{O})_{7.5}(^i\text{PrS})_{24}(\text{CH}_3\text{COO})_5]$ .

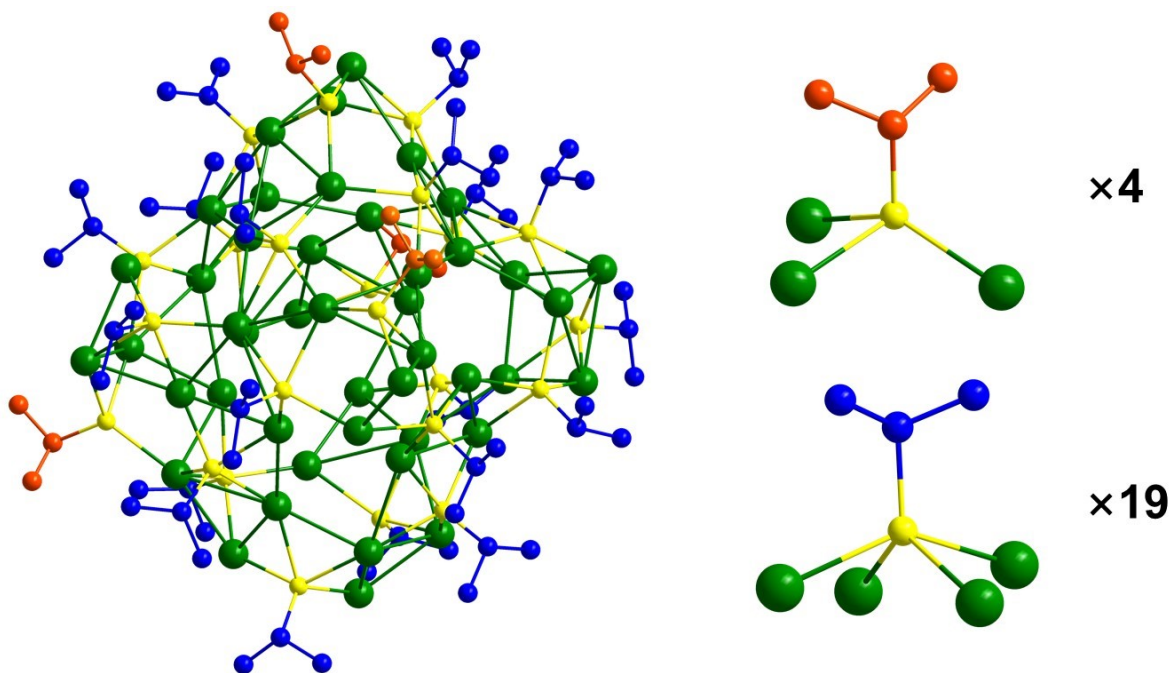

**Fig. S11** The coordination modes of 23  $^i\text{PrS}^-$  ligands towards silver atoms in  $\text{Ag}_{45}$  cluster. Color codes: green, Ag; yellow, S; orange, C; blue, C.

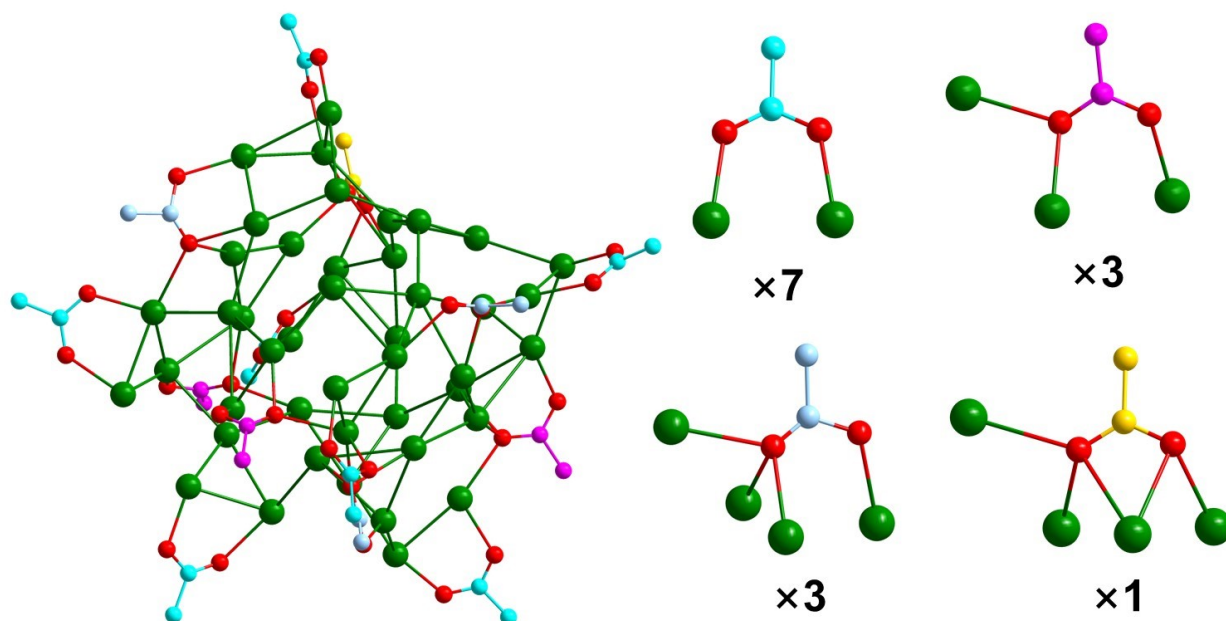

**Fig. S12** The coordination modes of 14  $\text{CH}_3\text{COO}^-$  ligands towards silver atoms in  $\text{Ag}_{45}$  cluster. Color codes: green, Ag; red, O; turquoise, C; pink, C; light turquoise, C; gold, C.

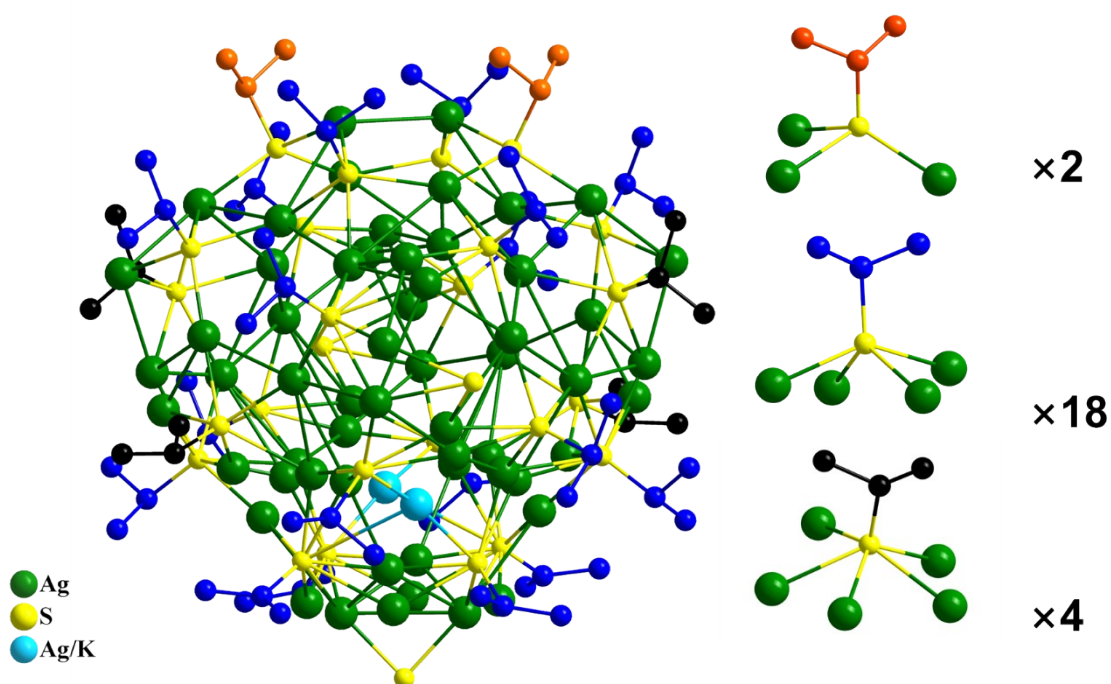

**Fig. S13** The coordination modes of 24  $t\text{PrS}^-$  ligands towards silver atoms in  $\text{Ag}_{41}$  cluster. Color codes: green, Ag; yellow, S; black, C; orange, C; blue, C; sky blue, Ag/K.

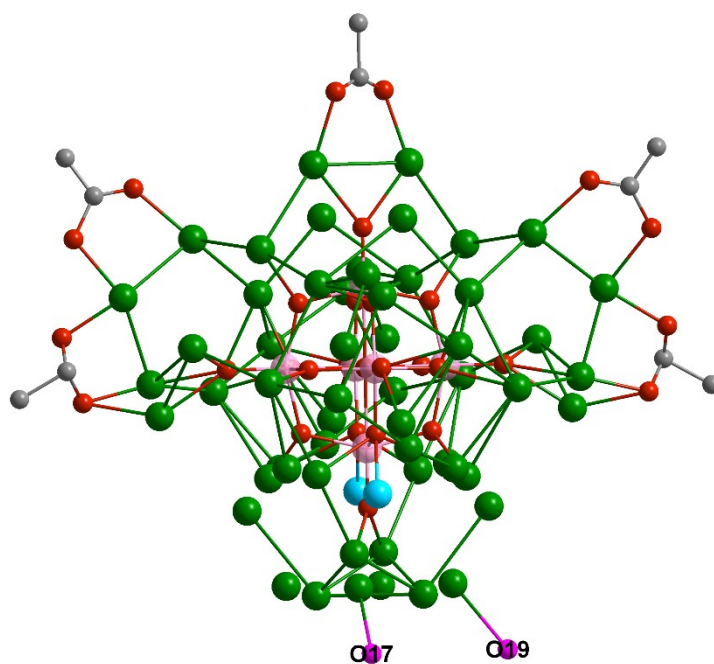

**Fig. S14** The coordination modes of 5  $\text{CH}_3\text{COO}^-$  ligands towards silver atoms in  $\text{Ag}_{41}$  cluster. Color codes: green, Ag; pink, Nb; red, O; purple, O; gray, C; sky blue, Ag/K.

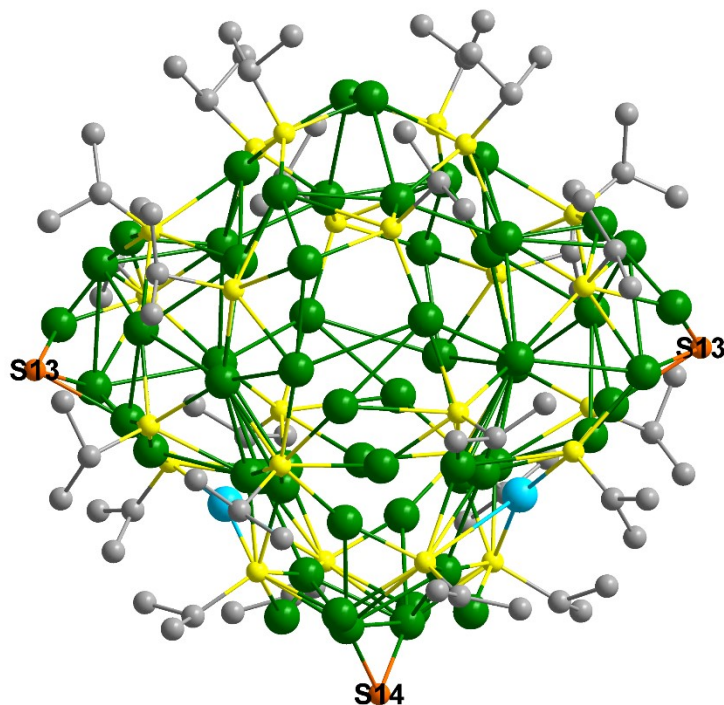

**Fig. S15** The coordination modes of S atoms in  $\text{Ag}_{41}$  cluster. Color codes: green, Ag; yellow, S; orange, S; gray, C; sky blue, K/Ag. Note: The S14 atom adopted 50% occupancy (Occu: 1; Xtal: 0.25).

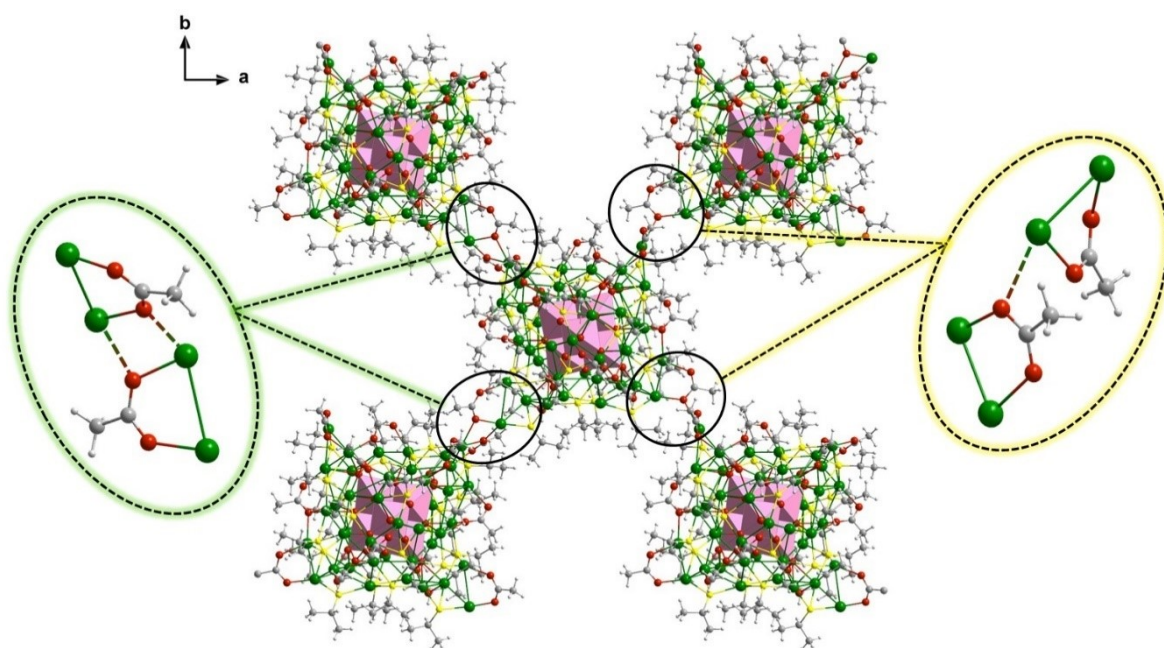

**Fig. S16** Packing structure of  $\text{Ag}_{45}$  cluster in the  $bc$  plane. Color codes: green, Ag; pink polyhedron,  $[\text{Nb}_6\text{O}_{19}]^{8-}$ ; yellow, S; red, O; gray, C; white, H.

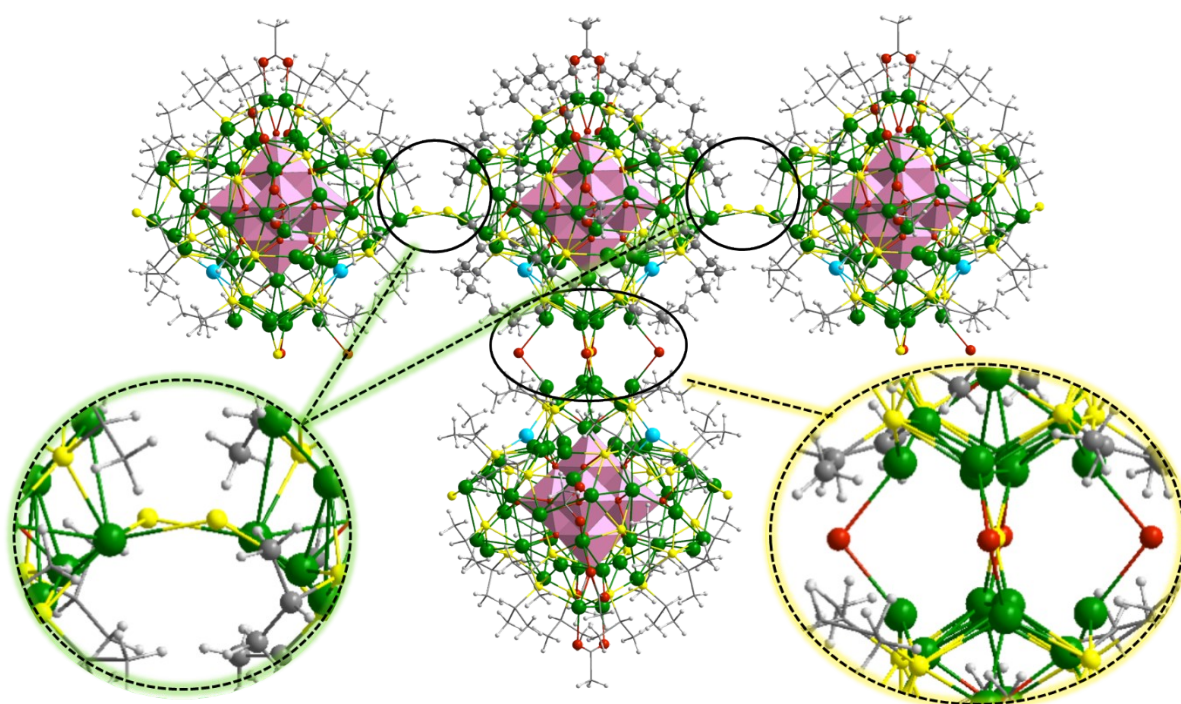

**Fig. S17** Packing structure of  $\text{Ag}_{41}$  cluster. Color codes: green, Ag; pink polyhedron,  $[\text{Nb}_6\text{O}_{19}]^{8-}$ ; yellow, S; red, O; gray, C; white, H; sky blue, Ag/K.

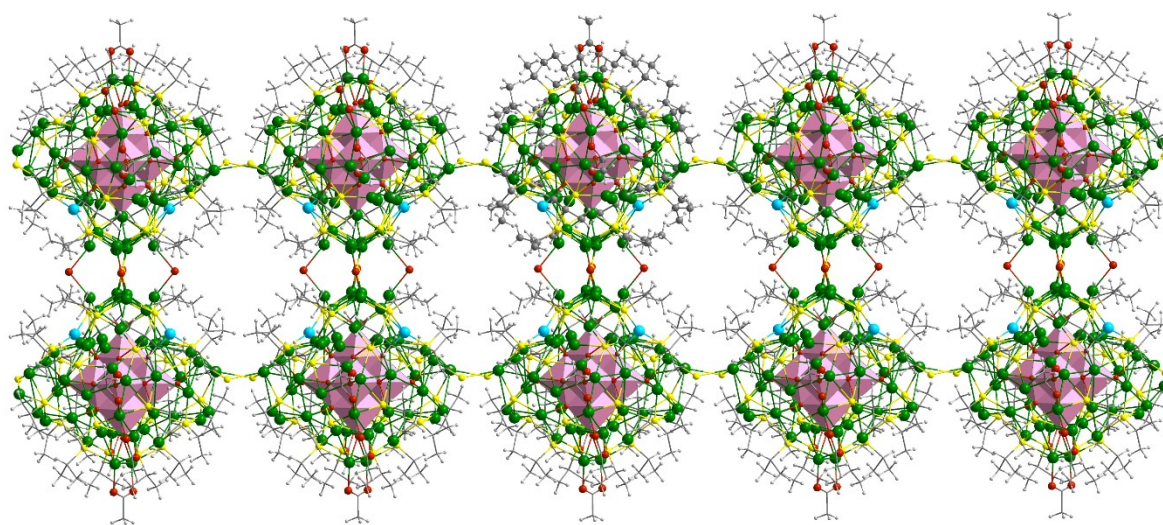

**Fig. S18** One-dimensional chain structure of  $\text{Ag}_{41}$  cluster. Color codes: green, Ag; pink polyhedron,  $[\text{Nb}_6\text{O}_{19}]^{8-}$ ; yellow, S; red, O; gray, C; white, H; sky blue, Ag/K.

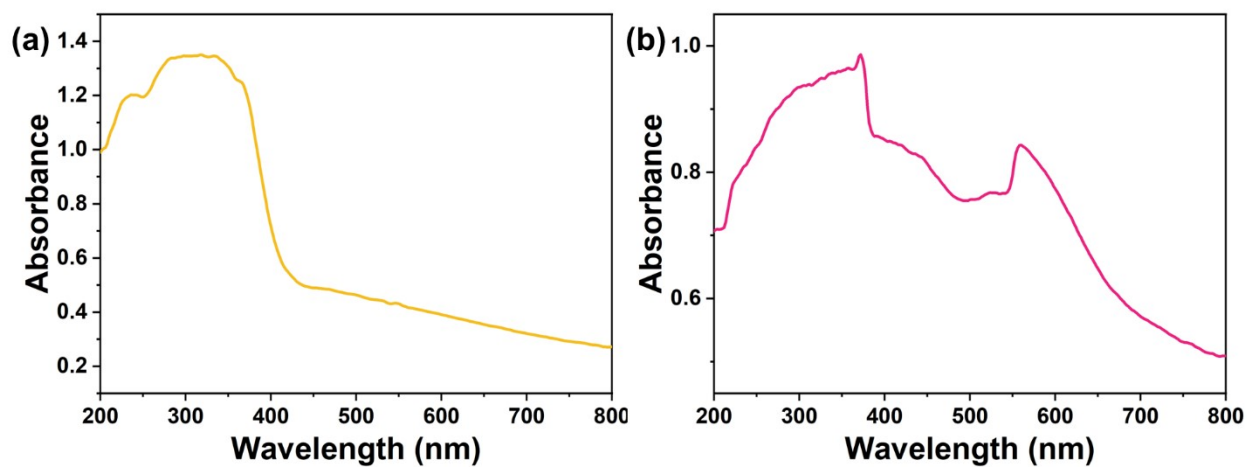

**Fig. S19** The solid-state UV-vis diffuse reflectance spectra of (a)  $\text{Ag}_{45}$  and (b)  $\text{Ag}_{41}$  clusters collected by using optional Integration Sphere accessory.

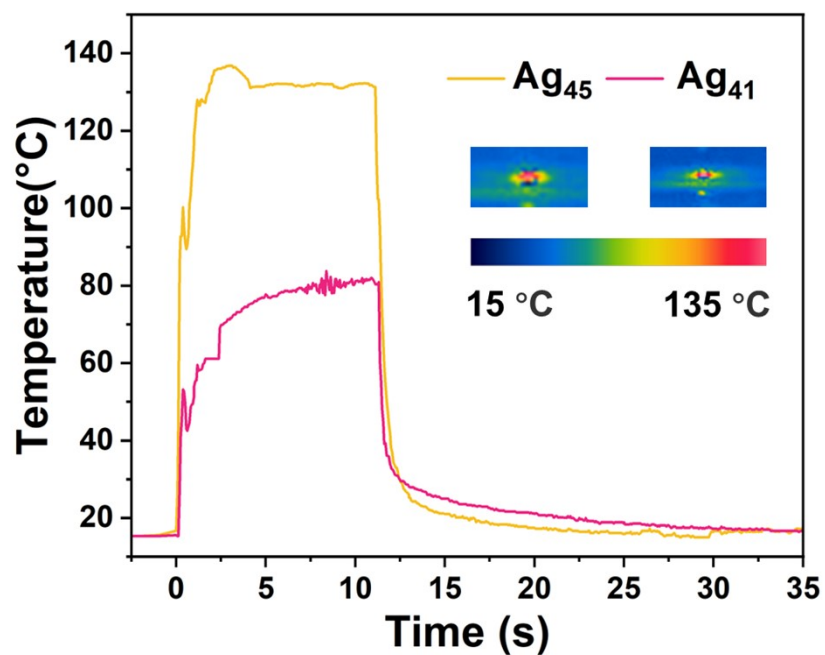

**Fig. S20** Photothermal conversion of  $\text{Ag}_{45}$  and  $\text{Ag}_{41}$  clusters under 532 nm laser irradiation ( $1.0 \text{ W cm}^{-2}$ ). Insets: thermal images of  $\text{Ag}_{45}$  and  $\text{Ag}_{41}$  clusters at the highest temperature.

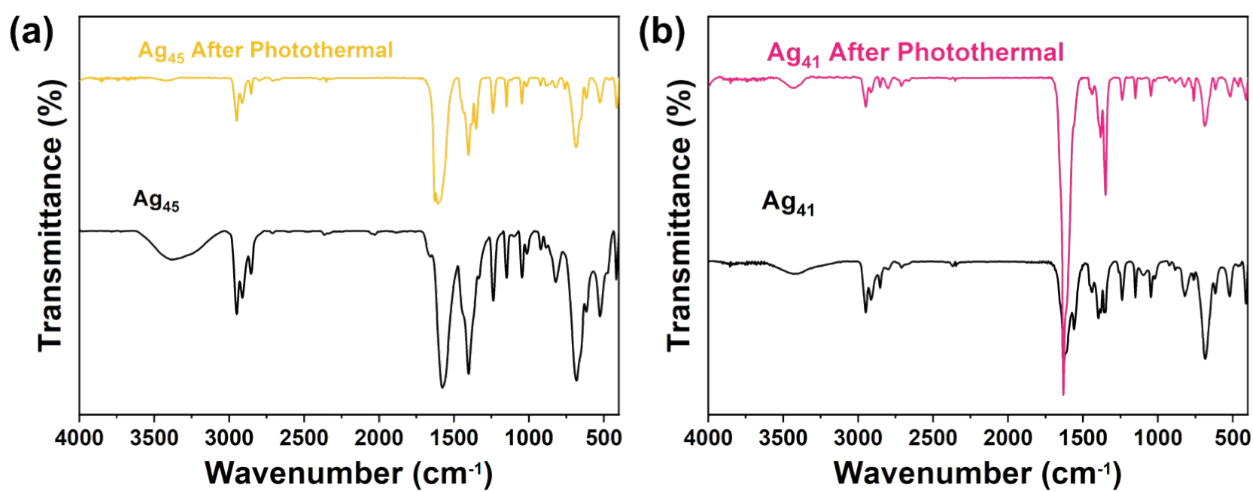

**Fig. S21** FT-IR spectra of (a)  $\text{Ag}_{45}$  and (b)  $\text{Ag}_{41}$  clusters before and after photothermal tests.

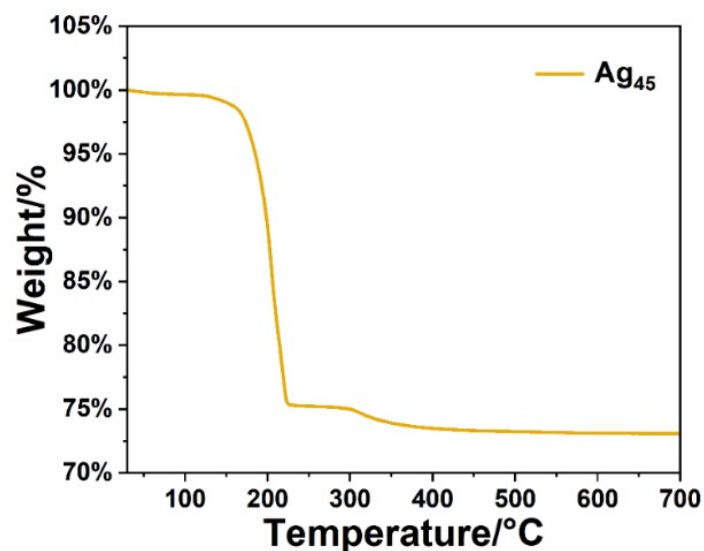

**Figure S22.** TGA curves of Ag<sub>45</sub> at a scanning rate of 10 °C/min under N<sub>2</sub> atmosphere. Note: The structure remains stable at a temperature up to 150 °C, and the further increase of temperature to 700 °C led to a weight loss of ~27.5%, corresponding to the partial loss of the peripheral organic ligands. The final residue should be a mixture of Nb<sub>2</sub>O<sub>5</sub> and Ag<sub>2</sub>S species.

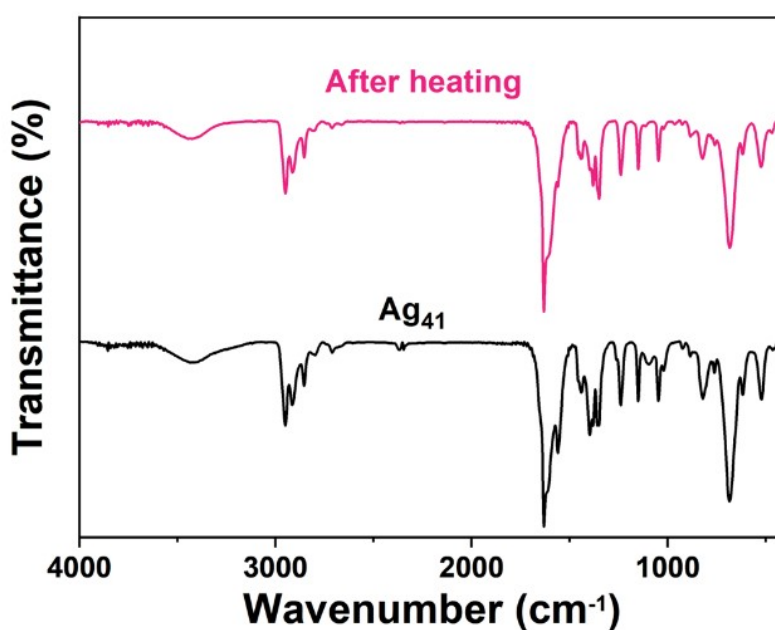

**Figure S23.** FT-IR spectra of Ag<sub>41</sub> clusters before and after heating at 80 °C for 10 minutes. Note: the unchanged FT-IR spectra confirmed its thermal stability which is also consistent with the FT-IR results collected after the photothermal test.



**Table 1.** Crystal data and structure refinements for **Ag<sub>45</sub>** and **Ag<sub>41</sub>**.

| Compound                                                                                             | Ag <sub>45</sub>                                                                                  | Ag <sub>41</sub>                                                                                       |
|------------------------------------------------------------------------------------------------------|---------------------------------------------------------------------------------------------------|--------------------------------------------------------------------------------------------------------|
| Empirical formula                                                                                    | C <sub>97</sub> H <sub>203</sub> Ag <sub>45</sub> Nb <sub>6</sub> O <sub>47</sub> S <sub>23</sub> | C <sub>82</sub> H <sub>210</sub> Ag <sub>41</sub> KNb <sub>6</sub> O <sub>42.5</sub> S <sub>26.5</sub> |
| $M_r$ (g mol <sup>-1</sup> )                                                                         | 8270.57                                                                                           | 7745.31                                                                                                |
| Temperature/K                                                                                        | 179.99                                                                                            | 179.99                                                                                                 |
| Crystal system                                                                                       | orthorhombic                                                                                      | tetragonal                                                                                             |
| Space group                                                                                          | <i>Pbca</i>                                                                                       | <i>P4<sub>2</sub>2<sub>1</sub>2</i>                                                                    |
| $a$ (Å)                                                                                              | 28.7435(6)                                                                                        | 32.1512(5)                                                                                             |
| $b$ (Å)                                                                                              | 28.3372(6)                                                                                        | 32.1512(5)                                                                                             |
| $c$ (Å)                                                                                              | 48.7703(2)                                                                                        | 17.6732(3)                                                                                             |
| $\alpha$ (°)                                                                                         | 90.00                                                                                             | 90.00                                                                                                  |
| $\beta$ (°)                                                                                          | 90.00                                                                                             | 90.00                                                                                                  |
| $\gamma$ (°)                                                                                         | 90.00                                                                                             | 90.00                                                                                                  |
| $V/\text{Å}^3$                                                                                       | 39723.9(2)                                                                                        | 18268.8(6)                                                                                             |
| $Z$                                                                                                  | 8                                                                                                 | 4                                                                                                      |
| $\rho_{\text{calcd}}$ (g cm <sup>-3</sup> )                                                          | 2.766                                                                                             | 2.816                                                                                                  |
| $\mu$ mm <sup>-1</sup>                                                                               | 4.946                                                                                             | 5.017                                                                                                  |
| $F(000)$                                                                                             | 31120                                                                                             | 14632                                                                                                  |
| Crystal size/mm <sup>3</sup>                                                                         | 0.21 × 0.2 × 0.19                                                                                 | 0.3 × 0.3 × 0.2                                                                                        |
| limiting indices                                                                                     | -33 ≤ $h$ ≤ 34<br>-32 ≤ $k$ ≤ 33<br>-25 ≤ $l$ ≤ 58                                                | -43 ≤ $h$ ≤ 24<br>-33 ≤ $k$ ≤ 40<br>-22 ≤ $l$ ≤ 22                                                     |
| no. of reflections collected                                                                         | 139769                                                                                            | 77451                                                                                                  |
| no. of independent reflections                                                                       | 34941                                                                                             | 22246                                                                                                  |
| restraints/parameters                                                                                | 1895/2098                                                                                         | 314/796                                                                                                |
| $\theta_{\text{min}}/\theta_{\text{max}}$                                                            | 1.951/25.000                                                                                      | 2.003/30.141                                                                                           |
| $R_{\text{int}}$                                                                                     | 0.1186                                                                                            | 0.0573                                                                                                 |
| GooF                                                                                                 | 1.033                                                                                             | 1.074                                                                                                  |
| $R [I > 2\sigma]$                                                                                    | $R_1 = 0.0761$<br>$wR_2 = 0.1835$                                                                 | $R_1 = 0.0800$<br>$wR_2 = 0.2074$                                                                      |
| $R(\text{all data})$                                                                                 | $R_1 = 0.1290$<br>$wR_2 = 0.2071$                                                                 | $R_1 = 0.1399$<br>$wR_2 = 0.2356$                                                                      |
| $R_1 = \sum( F_o  -  F_c )/\sum F_o $ , $wR_2 = \{\sum[w(F_o^2 - F_c^2)^2]/\sum[w(F_o^2)^2]\}^{1/2}$ |                                                                                                   |                                                                                                        |

**Table S2.** Selected bond distances (Å) for **Ag<sub>45</sub>**.

|      |      |           |      |      |           |
|------|------|-----------|------|------|-----------|
| Ag10 | Ag25 | 3.135(2)  | Ag33 | S6   | 2.516(4)  |
| Ag10 | Ag9  | 2.851(2)  | Ag33 | S9   | 2.607(5)  |
| Ag10 | Ag30 | 2.8424(2) | Ag34 | Ag19 | 3.104(2)  |
| Ag10 | Ag12 | 2.9440(2) | Ag34 | S8   | 2.412(6)  |
| Ag10 | S10  | 2.470(4)  | Ag34 | O1   | 2.152(2)  |
| Ag10 | S14  | 2.490(5)  | Ag35 | Ag2  | 2.850(2)  |
| Ag10 | O11  | 2.414(1)  | Ag35 | S18  | 2.563(5)  |
| Ag11 | S6   | 2.485(5)  | Ag35 | S11  | 2.553(5)  |
| Ag11 | S18  | 2.503(5)  | Ag35 | O47  | 2.427(1)  |
| Ag11 | O12  | 2.336(1)  | Ag35 | O45  | 2.335(1)  |
| Ag12 | S9   | 2.461(4)  | Ag36 | Ag6A | 3.174(3)  |
| Ag12 | O39  | 2.317(1)  | Ag36 | S21  | 2.571(4)  |
| Ag12 | O11  | 2.521(1)  | Ag36 | S22  | 2.577(4)  |
| Ag13 | Ag33 | 2.986(2)  | Ag36 | S8   | 2.529(5)  |
| Ag13 | Ag11 | 3.306(2)  | Ag36 | Ag9A | 2.982(1)  |
| Ag13 | S2   | 2.450(4)  | Ag37 | S12  | 2.429(4)  |
| Ag13 | O16  | 2.301(1)  | Ag37 | S17  | 2.897(5)  |
| Ag13 | Ag1  | 3.0733(1) | Ag37 | O22  | 2.188(1)  |
| Ag13 | O29  | 2.299(1)  | Ag3A | S4   | 2.619(9)  |
| Ag14 | Ag7A | 3.129(6)  | Ag3A | O44  | 2.585(2)  |
| Ag14 | Ag2  | 3.138(2)  | Ag4  | Ag21 | 2.938(2)  |
| Ag14 | S9   | 2.420(4)  | Ag4  | Ag23 | 3.3122(2) |
| Ag14 | O41  | 2.513(1)  | Ag4  | Ag27 | 2.9616(2) |
| Ag14 | S11  | 2.400(4)  | Ag4  | Ag7  | 3.277(2)  |
| Ag14 | Ag5A | 3.154(1)  | Ag4  | S24  | 2.439(5)  |
| Ag15 | Ag22 | 3.328(2)  | Ag4A | Ag3A | 2.938(1)  |
| Ag15 | Ag29 | 3.3712(2) | Ag4A | S4   | 2.359(7)  |
| Ag15 | Ag17 | 2.987(2)  | Ag4A | Ag5A | 3.095(1)  |
| Ag15 | S1   | 2.538(5)  | Ag4A | Ag1A | 3.314(1)  |
| Ag15 | S3   | 2.538(5)  | Ag5  | Ag23 | 3.089(2)  |
| Ag15 | O42  | 2.383(1)  | Ag5  | Ag37 | 3.003(2)  |
| Ag16 | Ag32 | 3.061(2)  | Ag5  | S24  | 2.404(4)  |
| Ag16 | S10  | 2.535(4)  | Ag5  | S17  | 2.436(4)  |
| Ag16 | S5   | 2.548(5)  | Ag5  | O33  | 2.470(9)  |
| Ag16 | O28  | 2.351(9)  | Ag5  | Ag1  | 3.0016(2) |
| Ag16 | O24  | 2.585(1)  | Ag6  | Ag16 | 2.9990(2) |
| Ag17 | Ag6A | 3.131(3)  | Ag6  | Ag32 | 3.306(2)  |
| Ag17 | S1   | 2.439(5)  | Ag6  | Ag27 | 3.2848(2) |
| Ag17 | S18  | 2.480(5)  | Ag6  | S13  | 2.512(4)  |
| Ag17 | O8   | 2.595(9)  | Ag6  | S10  | 2.574(4)  |
| Ag19 | S1   | 2.742(5)  | Ag6  | O25  | 2.320(9)  |
| Ag19 | O26  | 2.573(1)  | Ag6  | O3   | 2.417(1)  |
| Ag19 | O37  | 2.321(1)  | Ag6A | S21  | 2.483(5)  |
| Ag19 | O19  | 2.495(1)  | Ag6A | O8   | 2.284(1)  |
| Ag19 | O20  | 2.554(2)  | Ag6A | O47  | 2.292(1)  |
| Ag2  | Ag11 | 3.025(2)  | Ag7  | Ag29 | 3.276(2)  |
| Ag2  | S6   | 2.431(5)  | Ag7  | S24  | 2.631(5)  |

|      |      |           |      |      |           |
|------|------|-----------|------|------|-----------|
| Ag2  | S11  | 2.923(5)  | Ag7  | S12  | 2.585(5)  |
| Ag2  | O40  | 2.218(1)  | Ag7  | S20  | 2.615(5)  |
| Ag20 | Ag34 | 3.062(2)  | Ag7  | O6   | 2.483(1)  |
| Ag20 | Ag36 | 3.262(2)  | Ag7A | Ag31 | 3.163(7)  |
| Ag20 | Ag19 | 3.080(2)  | Ag7A | Ag12 | 2.967(5)  |
| Ag20 | Ag6A | 3.253(3)  | Ag7A | S9   | 2.622(8)  |
| Ag20 | S1   | 2.453(5)  | Ag7A | O13  | 2.582(1)  |
| Ag20 | S8   | 2.440(5)  | Ag7A | O28  | 2.539(1)  |
| Ag20 | O48  | 2.551(1)  | Ag7A | S7   | 2.521(7)  |
| Ag21 | Ag7  | 2.995(2)  | Ag7A | Ag5A | 3.354(8)  |
| Ag21 | S19  | 2.454(4)  | Ag8  | Ag26 | 3.0963(2) |
| Ag21 | S20  | 2.508(4)  | Ag8  | S15  | 2.543(4)  |
| Ag21 | O43  | 2.236(1)  | Ag8  | O27  | 2.443(1)  |
| Ag22 | Ag37 | 2.977(2)  | Ag8  | Ag3A | 3.124(7)  |
| Ag22 | Ag29 | 3.271(2)  | Ag8  | Ag8A | 3.295(4)  |
| Ag22 | S12  | 2.459(5)  | Ag8  | Ag9A | 3.104(1)  |
| Ag22 | S3   | 2.517(5)  | Ag8A | O5   | 2.318(2)  |
| Ag22 | O33  | 2.571(1)  | Ag8A | Ag9A | 2.96(2)   |
| Ag22 | O7   | 2.405(2)  | Ag9  | Ag30 | 3.367(2)  |
| Ag23 | S24  | 2.573(5)  | Ag9  | S16  | 2.501(5)  |
| Ag23 | S16  | 2.528(4)  | Ag9  | S10  | 2.539(5)  |
| Ag23 | Ag1  | 3.2773(2) | Ag9  | O15  | 2.288(1)  |
| Ag23 | O3   | 2.488(1)  | Nb1  | O16  | 2.044(9)  |
| Ag24 | Ag37 | 2.908(2)  | Nb1  | O35  | 1.997(1)  |
| Ag24 | S17  | 2.574(4)  | Nb1  | O42  | 2.036(1)  |
| Ag24 | S3   | 2.539(5)  | Nb1  | O38  | 2.399(1)  |
| Ag24 | O31  | 2.305(2)  | Nb1  | O33  | 1.789(1)  |
| Ag24 | O29  | 2.479(1)  | Nb1  | O18  | 1.970(9)  |
| Ag25 | Ag12 | 3.279(3)  | Nb2  | O8   | 2.007(9)  |
| Ag25 | S2   | 2.513(4)  | Nb2  | O42  | 2.023(1)  |
| Ag25 | S16  | 2.663(4)  | Nb2  | O36  | 1.953(1)  |
| Ag25 | O39  | 2.501(1)  | Nb2  | O38  | 2.360(9)  |
| Ag25 | S14  | 2.484(4)  | Nb2  | O26  | 1.787(1)  |
| Ag25 | Ag1  | 3.090(2)  | Nb2  | O34  | 1.984(9)  |
| Ag26 | Ag27 | 3.155(2)  | Nb3  | O41  | 1.774(9)  |
| Ag26 | Ag28 | 2.944(2)  | Nb3  | O16  | 2.029(1)  |
| Ag26 | S13  | 2.496(4)  | Nb3  | O8   | 2.034(1)  |
| Ag26 | S15  | 2.521(4)  | Nb3  | O4   | 1.972(9)  |
| Ag26 | O17  | 2.314(1)  | Nb3  | O13  | 2.011(1)  |
| Ag27 | Ag28 | 3.155(2)  | Nb3  | O38  | 2.385(9)  |
| Ag27 | S13  | 2.454(5)  | Nb4  | O38  | 2.383(9)  |
| Ag27 | S19  | 2.495(5)  | Nb4  | O25  | 2.019(1)  |
| Ag27 | O14  | 2.410(1)  | Nb4  | O27  | 2.032(1)  |
| Ag28 | S15  | 2.552(4)  | Nb4  | O30  | 1.776(9)  |
| Ag28 | S19  | 2.516(5)  | Nb4  | O34  | 2.003(9)  |
| Ag28 | O46  | 2.449(1)  | Nb4  | O18  | 1.955(1)  |
| Ag28 | O32  | 2.388(1)  | Nb5  | O4   | 1.957(9)  |
| Ag29 | S20  | 2.435(4)  | Nb5  | O39  | 1.805(9)  |
| Ag29 | O42  | 2.300(1)  | Nb5  | O28  | 2.016(1)  |

|      |      |           |     |      |          |
|------|------|-----------|-----|------|----------|
| Ag29 | O20  | 2.384(1)  | Nb5 | O35  | 1.998(1) |
| Ag2A | S5   | 2.483(7)  | Nb5 | O38  | 2.372(9) |
| Ag2A | Ag3A | 3.062(2)  | Nb5 | O25  | 2.001(1) |
| Ag2A | S4   | 2.519(7)  | Nb6 | O23  | 1.811(1) |
| Ag2A | O10  | 2.437(2)  | Nb6 | O13  | 2.017(9) |
| Ag2A | Ag1A | 3.269(1)  | Nb6 | O28  | 2.035(9) |
| Ag3  | Ag15 | 3.0033(2) | Nb6 | O36  | 1.958(1) |
| Ag3  | Ag13 | 3.2305(2) | Nb6 | O38  | 2.372(1) |
| Ag3  | Ag17 | 2.9101(2) | Nb6 | O27  | 2.024(9) |
| Ag3  | Ag11 | 3.302(2)  | O13 | Ag5A | 2.400(1) |
| Ag3  | S18  | 2.528(5)  | O19 | O5   | 1.77(2)  |
| Ag3  | O16  | 2.418(9)  | O19 | Ag9A | 2.295(2) |
| Ag3  | S3   | 2.521(5)  | O21 | Ag1A | 2.322(2) |
| Ag30 | S14  | 2.377(4)  | O23 | Ag4A | 2.563(1) |
| Ag30 | O46  | 2.214(1)  | O23 | Ag3A | 2.410(1) |
| Ag30 | O32  | 2.351(1)  | O35 | Ag1  | 2.403(1) |
| Ag31 | Ag2A | 3.307(5)  | S11 | Ag5A | 2.706(1) |
| Ag31 | S5   | 2.558(4)  | S15 | Ag8A | 2.657(8) |
| Ag31 | S7   | 2.575(5)  | S16 | Ag1  | 2.650(4) |
| Ag31 | O2   | 2.300(2)  | S17 | Ag1  | 2.538(5) |
| Ag31 | Ag1A | 2.865(5)  | S2  | Ag1  | 2.759(4) |
| Ag32 | S13  | 2.542(4)  | S22 | Ag3A | 2.650(1) |
| Ag32 | S5   | 2.517(5)  | S22 | Ag9A | 2.348(1) |
| Ag32 | O27  | 2.434(1)  | S4  | Ag1A | 2.539(7) |
| Ag33 | Ag11 | 3.310(2)  | S7  | Ag1A | 2.574(1) |
| Ag33 | S2   | 2.476(4)  |     |      |          |

**Table S3.** Selected bond distances (Å) for Ag<sub>41</sub>.

|      |                   |          |     |                  |          |
|------|-------------------|----------|-----|------------------|----------|
| Ag1  | S2                | 2.515(6) | Nb2 | O8               | 1.992(1) |
| Ag1  | S1 <sup>1</sup>   | 2.594(6) | Nb2 | O2               | 2.002(1) |
| Ag1  | O1                | 2.435(1) | Nb2 | O5               | 2.004(1) |
| Ag1  | O12               | 2.26(2)  | Nb2 | O7               | 2.377(1) |
| Ag10 | S3                | 2.422(6) | Nb2 | O4               | 1.789(1) |
| Ag10 | S7                | 2.457(8) | Nb2 | O9 <sup>1</sup>  | 1.970(1) |
| Ag10 | O4                | 2.503(1) | Nb3 | O3 <sup>1</sup>  | 1.974(1) |
| Ag7  | Ag27              | 2.749(6) | Nb3 | O10              | 1.979(1) |
| Ag26 | Ag30              | 2.760(2) | Nb3 | O6               | 1.751(1) |
| Ag26 | Ag30 <sup>1</sup> | 2.770(3) | Nb3 | O5               | 1.981(1) |
| Ag6  | Ag7               | 2.884(4) | Nb3 | O7               | 2.374(2) |
| Ag11 | S4                | 2.464(6) | Nb3 | O9               | 1.998(1) |
| Ag11 | S12 <sup>1</sup>  | 2.494(6) | Nb4 | O10              | 2.008(1) |
| Ag11 | O9 <sup>1</sup>   | 2.499(1) | Nb4 | O10 <sup>1</sup> | 2.008(1) |
| Ag16 | Ag14              | 2.909(9) | Nb4 | O8 <sup>1</sup>  | 2.007(1) |
| Ag26 | Ag21              | 2.920(2) | Nb4 | O8               | 2.007(1) |
| Ag9  | Ag27              | 2.947(9) | Nb4 | O7               | 2.377(1) |
| Ag12 | O19               | 2.566(2) | Nb4 | O11              | 1.760(2) |
| Ag5  | Ag6               | 2.956(4) | O10 | Ag20             | 2.450(1) |

|      |                   |          |     |                   |          |
|------|-------------------|----------|-----|-------------------|----------|
| Ag10 | Ag18              | 2.962(6) | O11 | Ag26 <sup>1</sup> | 2.291(2) |
| Ag2  | Ag5               | 2.968(3) | O11 | Ag26              | 2.291(2) |
| Ag8  | Ag28              | 2.985(6) | O17 | Ag25 <sup>3</sup> | 2.514(2) |
| Ag19 | S7                | 2.714(9) | O17 | Ag25              | 2.514(2) |
| Ag19 | S11               | 2.442(1) | O4  | Ag18              | 2.379(1) |
| Ag19 | O8                | 2.581(1) | O6  | Ag27              | 2.419(1) |
| Ag3  | Ag4               | 2.991(4) | O6  | Ag28              | 2.423(2) |
| Ag8  | Ag11 <sup>1</sup> | 3.002(3) | O8  | Ag21              | 2.407(2) |
| Ag9  | Ag19              | 3.029(7) | O8  | Ag29              | 2.406(1) |
| Ag2  | S2                | 2.504(6) | O8  | K1                | 2.406(1) |
| Ag2  | S1                | 2.539(6) | S10 | Ag25              | 2.694(1) |
| Ag2  | S3                | 2.696(6) | S10 | Ag26              | 2.222(1) |
| Ag10 | Ag5               | 3.041(4) | S10 | Ag22              | 2.460(1) |
| Ag11 | Ag22              | 3.082(6) | S10 | Ag21              | 2.699(1) |
| Ag10 | Ag13              | 3.085(5) | S10 | Ag12 <sup>1</sup> | 2.526(8) |
| Ag1  | Ag1 <sup>1</sup>  | 3.088(4) | S10 | Ag23              | 2.232(1) |
| Ag19 | Ag17              | 3.089(1) | S10 | K1                | 3.711(1) |
| Ag1  | Ag3 <sup>1</sup>  | 3.092(3) | S10 | Ag30 <sup>1</sup> | 2.910(2) |
| Ag27 | O16               | 2.160(3) | S11 | Ag20              | 2.512(1) |
| Ag28 | O16               | 2.340(5) | S11 | Ag25              | 2.477(9) |
| Ag15 | Ag17              | 3.159(1) | S11 | Ag26              | 2.402(9) |
| Ag9  | Ag5               | 3.160(4) | S11 | Ag12              | 2.491(9) |
| Ag3  | S1                | 2.521(6) | S11 | Ag29              | 2.520(9) |
| Ag3  | S6 <sup>1</sup>   | 2.453(7) | S11 | K1                | 2.520(9) |
| Ag3  | O3                | 2.373(1) | S11 | Ag30              | 2.540(2) |
| Ag3  | Ag61              | 3.172(4) | S12 | Ag28              | 2.941(2) |
| Ag4  | S4                | 2.462(5) | S12 | Ag221             | 2.786(1) |
| Ag4  | S1                | 2.469(6) | S12 | Ag24 <sup>1</sup> | 2.423(7) |
| Ag4  | O2                | 2.518(1) | S13 | Ag15              | 2.698(1) |
| Ag9  | Ag20              | 3.202(1) | S13 | Ag15 <sup>2</sup> | 2.916(1) |
| Ag10 | Ag9               | 3.222(3) | S13 | Ag16 <sup>2</sup> | 2.458(8) |
| Ag4  | Ag13              | 3.237(7) | S13 | Ag16              | 2.513(1) |
| Ag5  | S3                | 2.662(6) | S13 | Ag18              | 2.577(2) |
| Ag5  | S5                | 2.620(7) | S14 | Ag30              | 2.350(2) |
| Ag5  | O5                | 2.517(1) | S14 | Ag30 <sup>3</sup> | 2.350(2) |
| Ag6  | S2                | 2.472(6) | S14 | Ag30 <sup>1</sup> | 2.350(2) |
| Ag6  | S5                | 2.634(7) | S14 | Ag30 <sup>4</sup> | 2.350(2) |
| Ag6  | O13               | 2.310(3) | S3  | Ag13              | 2.530(7) |
| Ag30 | Ag30 <sup>1</sup> | 3.250(5) | S3  | Ag14              | 2.426(7) |
| Ag23 | Ag30 <sup>1</sup> | 3.280(2) | S4  | Ag15              | 2.655(7) |
| Ag7  | O14               | 2.320(3) | S4  | Ag16              | 2.375(7) |
| Ag7  | O15               | 2.170(3) | S4  | Ag13              | 2.649(7) |
| Ag11 | Ag21              | 3.302(2) | S4  | Ag14              | 2.465(7) |
| Ag8  | S12               | 2.394(6) | S5  | Ag7               | 2.690(8) |
| Ag8  | S6                | 2.365(7) | S5  | Ag27              | 2.668(1) |
| Ag8  | O6                | 2.494(1) | S6  | Ag7               | 2.581(8) |
| Ag11 | Ag4               | 3.305(3) | S7  | Ag17              | 2.365(9) |
| Ag15 | Ag13              | 3.346(7) | S7  | Ag18              | 2.666(1) |
| Ag2  | Ag4               | 3.348(3) | S8  | Ag22              | 2.880(2) |

|      |                 |          |    |                   |          |
|------|-----------------|----------|----|-------------------|----------|
| Ag9  | S9 <sup>1</sup> | 2.656(7) | S8 | Ag21              | 2.253(1) |
| Ag9  | S7              | 2.576(6) | S8 | Ag15              | 2.557(9) |
| Ag9  | S5              | 2.567(7) | S8 | Ag17              | 2.377(1) |
| Ag9  | O5              | 2.563(1) | S8 | Ag18              | 2.436(9) |
| Ag10 | Ag17            | 3.359(9) | S8 | Ag29              | 2.434(9) |
| Ag11 | Ag15            | 3.371(5) | S8 | K1                | 2.434(9) |
| Nb1  | O3              | 2.002(1) | S9 | Ag20 <sup>1</sup> | 2.383(9) |
| Nb1  | O3 <sup>1</sup> | 2.002(1) | S9 | Ag27 <sup>1</sup> | 2.703(9) |
| Nb1  | O1              | 1.781(2) | S9 | Ag28 <sup>1</sup> | 2.428(1) |
| Nb1  | O2              | 1.993(1) | S9 | Ag24              | 2.455(7) |
| Nb1  | O2 <sup>1</sup> | 1.993(1) | S9 | Ag23              | 2.468(8) |
| Nb1  | O7              | 2.374(1) |    |                   |          |

(Symmetric codes: <sup>1</sup> + y, + x, 1 - z; <sup>2</sup> + y, + x, z; <sup>3</sup> 1-y, 1-x, 1 - z; <sup>4</sup> 1 - x, 1 - y, +z)

**Table S4.** BVS values for Nb atoms of **Ag<sub>45</sub>**.

|     |      |     |      |
|-----|------|-----|------|
| Nb1 | 4.84 | Nb4 | 4.87 |
| Nb2 | 4.88 | Nb5 | 4.80 |
| Nb3 | 4.71 | Nb6 | 4.77 |

**Table S5.** BVS values for Nb atoms of **Ag<sub>41</sub>**.

|     |      |     |      |
|-----|------|-----|------|
| Nb1 | 4.87 | Nb3 | 5.12 |
| Nb2 | 4.89 | Nb4 | 4.87 |

**Table S6.** PL decay lifetimes of **Ag<sub>45</sub>** and **Ag<sub>41</sub>** clusters upon excitation at 390 nm.

| Compounds              | $\tau_1$ ( $\mu$ s) | $\tau_2$ ( $\mu$ s) | $\tau_3$ ( $\mu$ s) | $\tau_{ave}$ ( $\mu$ s) |
|------------------------|---------------------|---------------------|---------------------|-------------------------|
| <b>Ag<sub>45</sub></b> | <b>1.98</b>         | <b>19.41</b>        | <b>80.10</b>        | <b>5.27</b>             |
| <b>Ag<sub>41</sub></b> | <b>6.64</b>         | <b>24.77</b>        | <b>89.84</b>        | <b>27.39</b>            |

## References

1. Z. Wang, H.-F. Su, X.-P. Wang, Q.-Q. Zhao, C.-H. Tung, D. Sun and L.-S. Zheng, *Chem. Eur. J.*, 2018, **24**, 1640-1650.
2. L. B. Fullmer, R. H. Mansergh, L. N. Zakharov, D. A. Keszler and M. Nyman, *Cryst. Growth Des.*, 2015, **15**, 3885-3892.
3. O. V. Dolomanov, L. J. Bourhis, R. J. Gildea, J. A. K. Howard and H. Puschmann, *J. Appl. Crystallogr.*, 2009, **42**, 339-341.
4. L. J. Bourhis, O. V. Dolomanov, R. J. Gildea, J. A. K. Howard and H. Puschmann, *Acta Crystallogr. A*, 2015, **71**, 59-75.
5. G. Sheldrick, *Acta Crystallogr. A*, 2008, **64**, 112-122.
6. G. Sheldrick, *Acta Crystallogr. C*, 2015, **71**, 3-8.
7. N. E. Brese and M. O'Keeffe, *Acta Crystallogr. B*, 1991, **47**, 192-197.
